# Supplementary material
Source: HighWire-hosted journal article supplement (https://injuryprevention.bmj.com/highwire/filestream/145396/field_highwire_adjunct_files/0/IP_Appendix_028118.docx)
Supplement: IP_Appendix_028118.docx [file IP_Appendix_028118.docx]

**APPENDIX: COST ESTIMATION EQUATIONS**

1) Direct costs

,

= direct costs, = direct healthcare costs, = direct non-healthcare costs

= type of injury by insurance, = gender, = age at which the individual was injured

= direct medical costs for hospitalization by gender and age to treat “i”

= direct medical costs for outpatient visits by gender and age to treat “i”

= drug costs by gender and age to treat “i”

= number of outpatient visits by gender and age to treat “i”

= number of admissions by gender and age to treat “i”

= average round-trip transportation costs

= annual inpatient days by gender and age to treat “i”

= average daily rate of professional nursing care

2) Indirect costs

=, =

=

= indirect costs, = productivity loss due to premature death,

= productivity loss due to absence from work, = productivity loss due to disability

= type of injury by insurance, = gender, = age at which the individual was injured,

= age of the individual

= rate of increase of labor productivity

= the real discount rate

= number of deaths attributable to “i” by gender and age

= probability that a person of gender “s” and age “y” will survive to age “n”

= annual average earnings of an employed person of gender “s” and age “n”

= proportion of the population of gender “s” and age “n” that are employed in the labor market

= annual inpatient days by gender and age to treat “i”

= number of outpatient visits by gender and age to treat “i”

= employment rate by gender and age

= daily average earnings of an employed person by gender and age

= number of inpatients by gender and age

= probability of labor force reduction resulting from disability attributable to “i”
